# Supplementary material
Source: PubMed Central journal article supplement (PMC2266961)
Supplement: jcem_jc.2007-0931_1.pdf [file jcem_jc.2007-0931_1.pdf]

**Table 1S.** Genes upregulated in isolated islets identified by microarray analysis.

| UniGene ID                       | Gene symbol | Gene name                                 | LCB  |
|----------------------------------|-------------|-------------------------------------------|------|
| <b>Exocrine pancreatic genes</b> |             |                                           |      |
| Hs.484588                        | AMY2A       | Amylase, alpha 2A; pancreatic             | 17.3 |
| Hs.511525                        | PRSS1       | Protease, serine, 1 (trypsin 1)           | 2.8  |
| Hs.367767                        | PRSS2       | Protease, serine, 2 (trypsin 2)           | 2.9  |
| Hs.128013                        | PRSS3       | Protease, serine, 3 (mesotrypsin)         | 2.4  |
| Hs.610926                        | CTRB1       | Chymotrypsinogen B1                       | 1.0  |
| Hs.631869                        | CTRC        | Chymotrypsin C (caldecrin)                | 1.4  |
| Hs.631866                        | ELA2A       | Elastase 2A                               | 4.2  |
| Hs.471034                        | ELA3A       | Elastase 3A, pancreatic (protease E)      | 5.2  |
| Hs.181289                        | ELA3B       | Elastase 3B, pancreatic                   | 2.9  |
| Hs.2879                          | CPA1        | Carboxypeptidase A1 (pancreatic)          | 1.0  |
| Hs.490038                        | CPA2        | Carboxypeptidase A2 (pancreatic)          | 6.5  |
| Hs.477891                        | CPB1        | Carboxypeptidase B1 (tissue)              | 16.5 |
| Hs.501135                        | PNLIP       | Pancreatic lipase                         | 2.9  |
| Hs.533258                        | CEL         | Carboxyl ester lipase                     | 1.5  |
| Hs.992                           | PLA2G1B     | Phospholipase A2, group IB (pancreas)     | 3.5  |
| Hs.1340                          | CLPS        | Colipase, pancreatic                      | 1.6  |
| Hs.53985                         | GP2         | Glycoprotein 2 (zymogen granule membrane) | 3.8  |
| Hs.155097                        | CA2         | Carbonic anhydrase II                     | 1.0  |
| Hs.2785                          | CK19        | Keratin 19                                | 0.7  |
| <b>Chemokine genes</b>           |             |                                           |      |
| Hs.624                           | IL8         | Interleukin 8                             | 24.9 |

|                                        |       |                                                 |      |
|----------------------------------------|-------|-------------------------------------------------|------|
| Hs.789                                 | GRO1  | Chemokine (C-X-C motif) ligand 1                | 2.9  |
| Hs.590921                              | GRO2  | Chemokine (C-X-C motif) ligand 2                | 31.0 |
| Hs.89690                               | GRO3  | Chemokine (C-X-C motif) ligand 3                | 9.2  |
| Hs.632592                              | IP9   | Chemokine (C-X-C motif) ligand 11               | 1.4  |
| Hs.75498                               | MIP3A | Chemokine (C-C motif) ligand 20                 | 2.8  |
| <b>Genes associated with hypoxia</b>   |       |                                                 |      |
| Hs.509554                              | HIF1A | Hypoxia-inducible factor 1, alpha subunit       | 1.7  |
| Hs.131494                              | HIF1B | Aryl hydrocarbon receptor nuclear translocator  | 1.2  |
| Hs.419240                              | GLUT3 | Solute carrier family 2, member 3               | 1.4  |
| Hs.406266                              | HK2   | Hexokinase 2                                    | 2.2  |
| Hs.78771                               | PGK1  | Phosphoglycerate kinase 1                       | 1.7  |
| Hs.2795                                | LDHA  | Lactate dehydrogenase A                         | 7.5  |
| Hs.500047                              | P4HA1 | Proline 4-hydroxylase, alpha polypeptide I      | 1.4  |
| Hs.144873                              | BNIP3 | BCL2/adenovirus E1B 19kDa interacting protein 3 | 2.7  |
| Hs.511899                              | EDN1  | Endothelin-1                                    | 4.6  |
| Hs.441047                              | ADM   | Adrenomedullin                                  | 3.3  |
| Hs.529618                              | TFRC  | Transferrin receptor                            | 3.4  |
| <b>Oxidative stress genes</b>          |       |                                                 |      |
| Hs.502302                              | CAT   | Catalase                                        | 4.7  |
| Hs.389700                              | MGST1 | Microsomal glutathione S-transferase 1          | 3.6  |
| Hs.487046                              | SOD2  | Superoxide dismutase 2, mitochondrial           | 9.8  |
| <b>Genes associated with apoptosis</b> |       |                                                 |      |
| TNF pathway associated genes           |       |                                                 |      |

|                                       |           |                                                        |     |
|---------------------------------------|-----------|--------------------------------------------------------|-----|
| Hs.521456                             | TNFRSF10B | Tumor necrosis factor receptor superfamily, member 10b | 6.0 |
| Hs.149168                             | TNFRSF19  | Tumor necrosis factor receptor superfamily, member 19  | 1.9 |
| Hs.510528                             | TRAF3     | TNF receptor-associated factor 3                       | 2.1 |
| Hs.591338                             | TNFAIP3   | Tumor necrosis factor, alpha-induced protein 3         | 9.0 |
| Hs.271955                             | TNFAIP8   | Tumor necrosis factor, alpha-induced protein 8         | 2.5 |
| Hs.503704                             | BIRC2     | Baculoviral IAP repeat-containing 2                    | 2.0 |
| Hs.127799                             | BIRC3     | Baculoviral IAP repeat-containing 3                    | 3.0 |
| Hs.356076                             | BIRC4     | Baculoviral IAP repeat-containing 4                    | 1.6 |
| Mitochondria pathway associated genes |           |                                                        |     |
| Hs.591054                             | BID       | BH3 interacting domain death agonist                   | 1.6 |
| Hs.412196                             | IFT57     | Intraflagellar transport 57 homolog                    | 3.7 |
| Hs.131226                             | BNIP3L    | BCL2/adenovirus E1B 19kDa interacting protein 3-like   | 2.0 |
| Hs.24719                              | MOAP1     | Modulator of apoptosis 1                               | 2.2 |
| Hs.150749                             | BCL2      | B-cell CLL/lymphoma 2                                  | 2.4 |
| Hs.645511                             | TEGT      | Testis enhanced gene transcript (BAX inhibitor 1)      | 1.4 |
| Hs.283454                             | BNIP2     | BCL2/adenovirus E1B 19kDa interacting protein 2        | 3.2 |
| Hs.631672                             | BCL2L13   | BCL2-like 13 (apoptosis facilitator)                   | 5.0 |
| Hs.437060                             | CYCS      | Cytochrome c, somatic                                  | 4.0 |
| Hs.516746                             | DAP3      | Death associated protein 3                             | 1.3 |
| P53 pathway associated genes          |           |                                                        |     |
| Hs.523968                             | TP53BP2   | Tumor protein p53 binding protein, 2                   | 3.1 |
| Hs.492261                             | TP53INP1  | Tumor protein p53 inducible nuclear protein 1          | 3.7 |
| Hs.397465                             | HIPK2     | Homeodomain interacting protein kinase 2               | 1.4 |

| Other apoptosis related genes |         |                                                     |     |
|-------------------------------|---------|-----------------------------------------------------|-----|
| Hs.486063                     | APG5L   | APG5 autophagy 5-like                               | 2.4 |
| Hs.193516                     | BCL10   | B-cell CLL/lymphoma 10                              | 3.5 |
| Hs.486542                     | BCLAF1  | BCL2-associated transcription factor 1              | 3.9 |
| Hs.141125                     | CASP3   | Caspase 3                                           | 3.6 |
| Hs.9216                       | CASP7   | Caspase 7                                           | 2.2 |
| Hs.390736                     | CFLAR   | CASP8 and FADD-like apoptosis regulator             | 3.3 |
| Hs.4900                       | CIAPIN1 | Cytokine induced apoptosis inhibitor 1              | 1.6 |
| Hs.58488                      | CTNNAL1 | Catenin (cadherin-associated protein), alpha-like 1 | 3.1 |
| Hs.173438                     | FAIM    | Fas apoptotic inhibitory molecule                   | 7.4 |
| Hs.362733                     | FEM1B   | Fem-1 homolog b (C. elegans)                        | 4.2 |
| Hs.13861                      | FKSG2   | Apoptosis inhibitor                                 | 1.2 |
| Hs.470887                     | GULP1   | GULP, engulfment adaptor PTB domain containing 1    | 4.9 |
| Hs.90753                      | HTATIP2 | HIV-1 Tat interactive protein 2, 30kDa              | 2.5 |
| Hs.252543                     | IKIP    | IKK interacting protein                             | 1.2 |
| Hs.367900                     | PDCD2   | Programmed cell death 2                             | 2.2 |
| Hs.232543                     | PDCD4   | Programmed cell death 4                             | 3.9 |
| Hs.553786                     | PDCD6   | Programmed cell death 6                             | 2.2 |
| Hs.478150                     | PDCD10  | Programmed cell death 10                            | 4.7 |
| Hs.475896                     | PDCD6IP | Programmed cell death 6 interacting protein         | 1.6 |
| Hs.617254                     | PHLDA1  | Pleckstrin homology-like domain, family A, member 1 | 5.6 |
| Hs.645283                     | RTN4    | Reticulon 4                                         | 4.5 |
| Hs.510078                     | SGK     | Serum/glucocorticoid regulated kinase               | 2.0 |

|                                                                     |           |                                                                        |     |
|---------------------------------------------------------------------|-----------|------------------------------------------------------------------------|-----|
| Hs.268887                                                           | STK17A    | Serine/threonine kinase 17a                                            | 2.6 |
| <b>Mitogen-activated protein kinesis genes</b>                      |           |                                                                        |     |
| ERK pathway genes                                                   |           |                                                                        |     |
| Hs.431850                                                           | MAPK1     | Mitogen-activated protein kinase 1                                     | 2.8 |
| Hs.411847                                                           | MAPK6     | Mitogen-activated protein kinase 6                                     | 2.7 |
| Hs.145442                                                           | MAP2K1    | Mitogen-activated protein kinase kinase 1                              | 3.8 |
| Hs.647988                                                           | MAP2K1IP1 | Mitogen-activated protein kinase kinase 1 interacting protein 1        | 2.4 |
| Hs.432453                                                           | MAP3K8    | Mitogen-activated protein kinase kinase kinase 8                       | 5.4 |
| JNK pathway genes                                                   |           |                                                                        |     |
| Hs.484371                                                           | MAPK9     | Mitogen-activated protein kinase 9                                     | 1.2 |
| Hs.514681                                                           | MAP2K4    | Mitogen-activated protein kinase kinase 4                              | 2.8 |
| Hs.145605                                                           | MAP3K2    | Mitogen-activated protein kinase kinase kinase 2                       | 4.3 |
| Hs.186486                                                           | MAP3K5    | Mitogen-activated protein kinase kinase kinase 5                       | 4.1 |
| Hs.468239                                                           | MAP4K3    | Mitogen-activated protein kinase kinase kinase kinase 3                | 1.6 |
| Hs.431550                                                           | MAP4K4    | Mitogen-activated protein kinase kinase kinase kinase 4                | 2.4 |
| Hs.130491                                                           | MAP4K5    | Mitogen-activated protein kinase kinase kinase kinase 5                | 4.7 |
| p38 MAPK pathway genes                                              |           |                                                                        |     |
| Hs.514012                                                           | MAP2K3    | Mitogen-activated protein kinase kinase 3                              | 1.4 |
| Hs.269775                                                           | MAP3K7IP2 | Mitogen-activated protein kinase kinase kinase 7 interacting protein 2 | 3.1 |
| <b>Other stress-associated genes</b>                                |           |                                                                        |     |
| Hs.518326                                                           | SERP1     | Stress-associated endoplasmic reticulum protein 1                      | 5.0 |
| <b>Molecular chaperone genes upregulated in the isolated islets</b> |           |                                                                        |     |

| Chaperonin genes |        |                                                               |     |
|------------------|--------|---------------------------------------------------------------|-----|
| Hs.632539        | HSP60  | Heat shock 60kDa protein 1 (chaperonin 60)                    | 2.5 |
| Hs.1197          | HSP10  | Heat shock 10kDa protein 1 (chaperonin 10)                    | 3.1 |
| Hs.189772        | CCT2   | Chaperonin containing TCP1, subunit 2 (beta)                  | 1.6 |
| Hs.421509        | CCT4   | Chaperonin containing TCP1, subunit 4 (delta)                 | 1.7 |
| Hs.1600          | CCT5   | Chaperonin containing TCP1, subunit 5 (epsilon)               | 1.5 |
| Hs.82916         | CCT6A  | Chaperonin containing TCP1, subunit 6A (zeta 1)               | 2.1 |
| Hs.73072         | CCT6B  | Chaperonin containing TCP1, subunit 6B (zeta 2)               | 1.4 |
| Hs.125113        | CCT8   | Chaperonin containing TCP1, subunit 8 (theta)                 | 2.0 |
| Chaperone genes  |        |                                                               |     |
| Hs.274402        | HSPA1B | Heat shock 70kDa protein 1B                                   | 1.3 |
| Hs.432648        | HSPA2  | Heat shock 70kDa protein 2                                    | 5.2 |
| Hs.90093         | HSPA4  | Heat shock 70kDa protein 4                                    | 9.4 |
| Hs.135554        | HSPA4L | Heat shock 70kDa protein 4-like                               | 2.3 |
| Hs.605502        | HSPA5  | Heat shock 70kDa protein 5 (glucose-regulated protein, 78kDa) | 4.1 |
| Hs.352642        | HSPA6  | Heat shock 70kDa protein 6                                    | 8.8 |
| Hs.180414        | HSPA8  | Heat shock 70kDa protein 8                                    | 3.8 |
| Hs.184233        | HSPA9B | Heat shock 70kDa protein 9B (mortalin-2)                      | 2.0 |
| Hs.534169        | HSPA14 | Heat shock 70kDa protein 14                                   | 3.4 |
| Hs.445203        | DNAJA1 | DnaJ (Hsp40) homolog, subfamily A, member 1                   | 3.3 |
| Hs.368078        | DNAJA2 | DnaJ (Hsp40) homolog, subfamily A, member 2                   | 4.6 |
| Hs.513053        | DNAJA4 | DnaJ (Hsp40) homolog, subfamily A, member 4                   | 5.3 |
| Hs.131887        | DNAJA5 | DnaJ homology subfamily A, member 5                           | 2.6 |

|           |             |                                                          |      |
|-----------|-------------|----------------------------------------------------------|------|
| Hs.515210 | DNAJB1      | DnaJ (Hsp40) homolog, subfamily B, member 1              | 4.4  |
| Hs.13852  | DNAJB4      | DnaJ (Hsp40) homolog, subfamily B, member 4              | 3.5  |
| Hs.490745 | DNAJB6      | DnaJ (Hsp40) homolog, subfamily B, member 6              | 2.7  |
| Hs.6790   | DNAJB9      | DnaJ (Hsp40) homolog, subfamily B, member 9              | 1.7  |
| Hs.317192 | DNAJB11     | DnaJ (Hsp40) homolog, subfamily B, member 11             | 2.2  |
| Hs.577426 | DNAJB14     | DnaJ (Hsp40) homolog, subfamily B, member 14             | 1.4  |
| Hs.647643 | DNAJC6      | DnaJ (Hsp40) homolog, subfamily C, member 6              | 2.0  |
| Hs.433540 | DNAJC8      | DnaJ (Hsp40) homolog, subfamily C, member 8              | 2.6  |
| Hs.408577 | DNAJC9      | DnaJ (Hsp40) homolog, subfamily C, member 9              | 3.2  |
| Hs.516632 | DNAJC10     | DnaJ (Hsp40) homolog, subfamily C, member 10             | 3.0  |
| Hs.260720 | DNAJC12     | DnaJ (Hsp40) homolog, subfamily C, member 12             | 1.7  |
| Hs.534196 | bA16L21.2.1 | DnaJ-like protein                                        | 3.3  |
| Hs.36927  | HSPH1       | Heat shock 105kDa/110kDa protein 1                       | 13.3 |
| Hs.525600 | HSPCA       | Heat shock 90kDa protein 1, alpha                        | 5.0  |
| Hs.509736 | HSPCB       | Heat shock 90kDa protein 1, beta                         | 3.7  |
| Hs.158195 | HSF2        | Heat shock transcription factor 2                        | 1.3  |
| Hs.29169  | HSPBAP1     | HSPB (heat shock 27kDa) associated protein 1             | 1.9  |
| Hs.352341 | STCH        | Stress 70 protein chaperone, microsome-associated, 60kDa | 1.6  |
| Hs.567968 | CANX        | Calnexin                                                 | 2.9  |

Lower confidence bound (LCB) was used to assess differentially expressed genes.
