# Supplementary material
Source: PubMed Central journal article supplement (PMC2266961)

ERK/MAPK Signaling

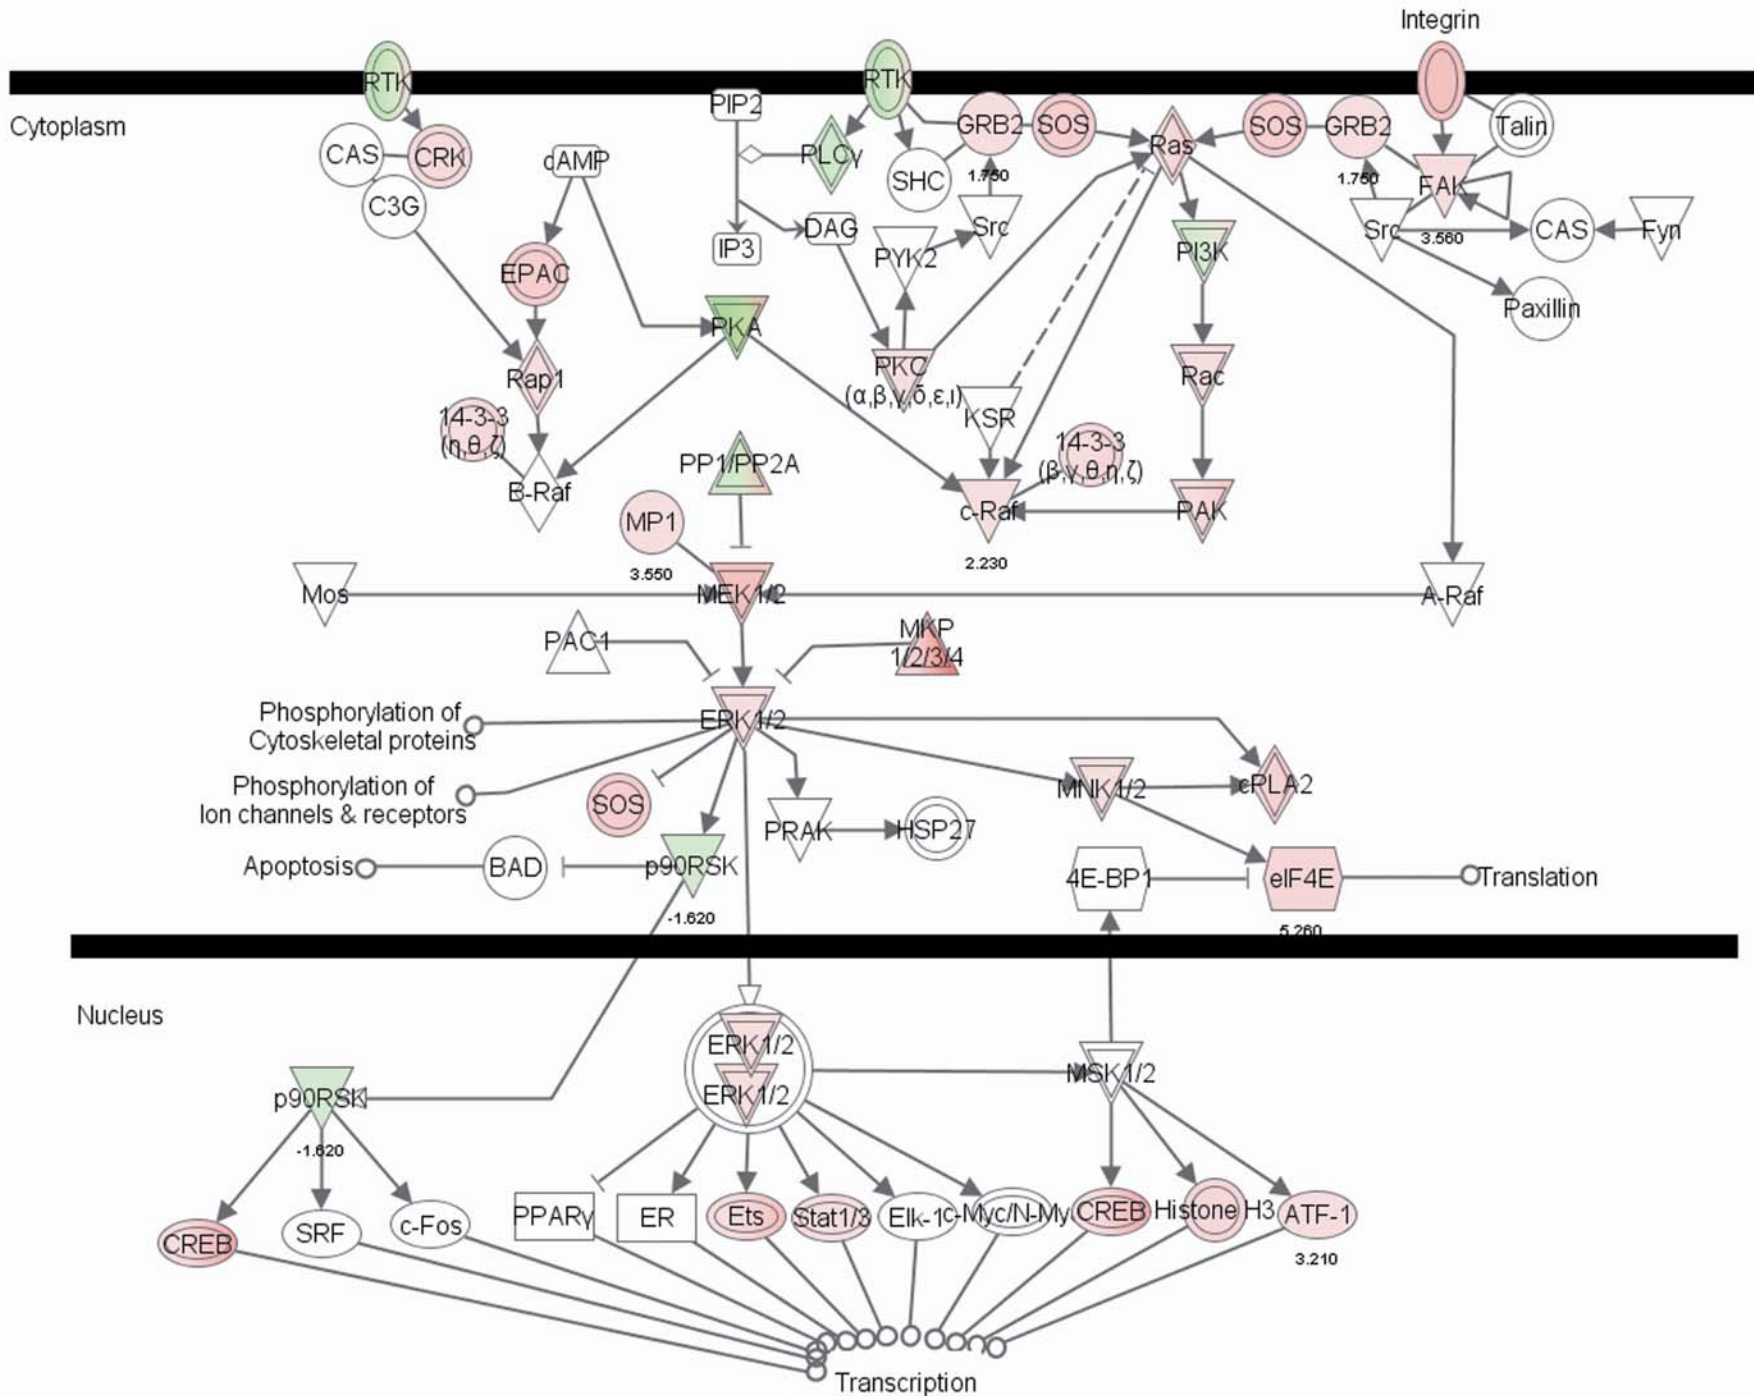

Fig. 3S

Supplement: jcem_jc.2007-0931_4.pdf [file jcem_jc.2007-0931_4.pdf]

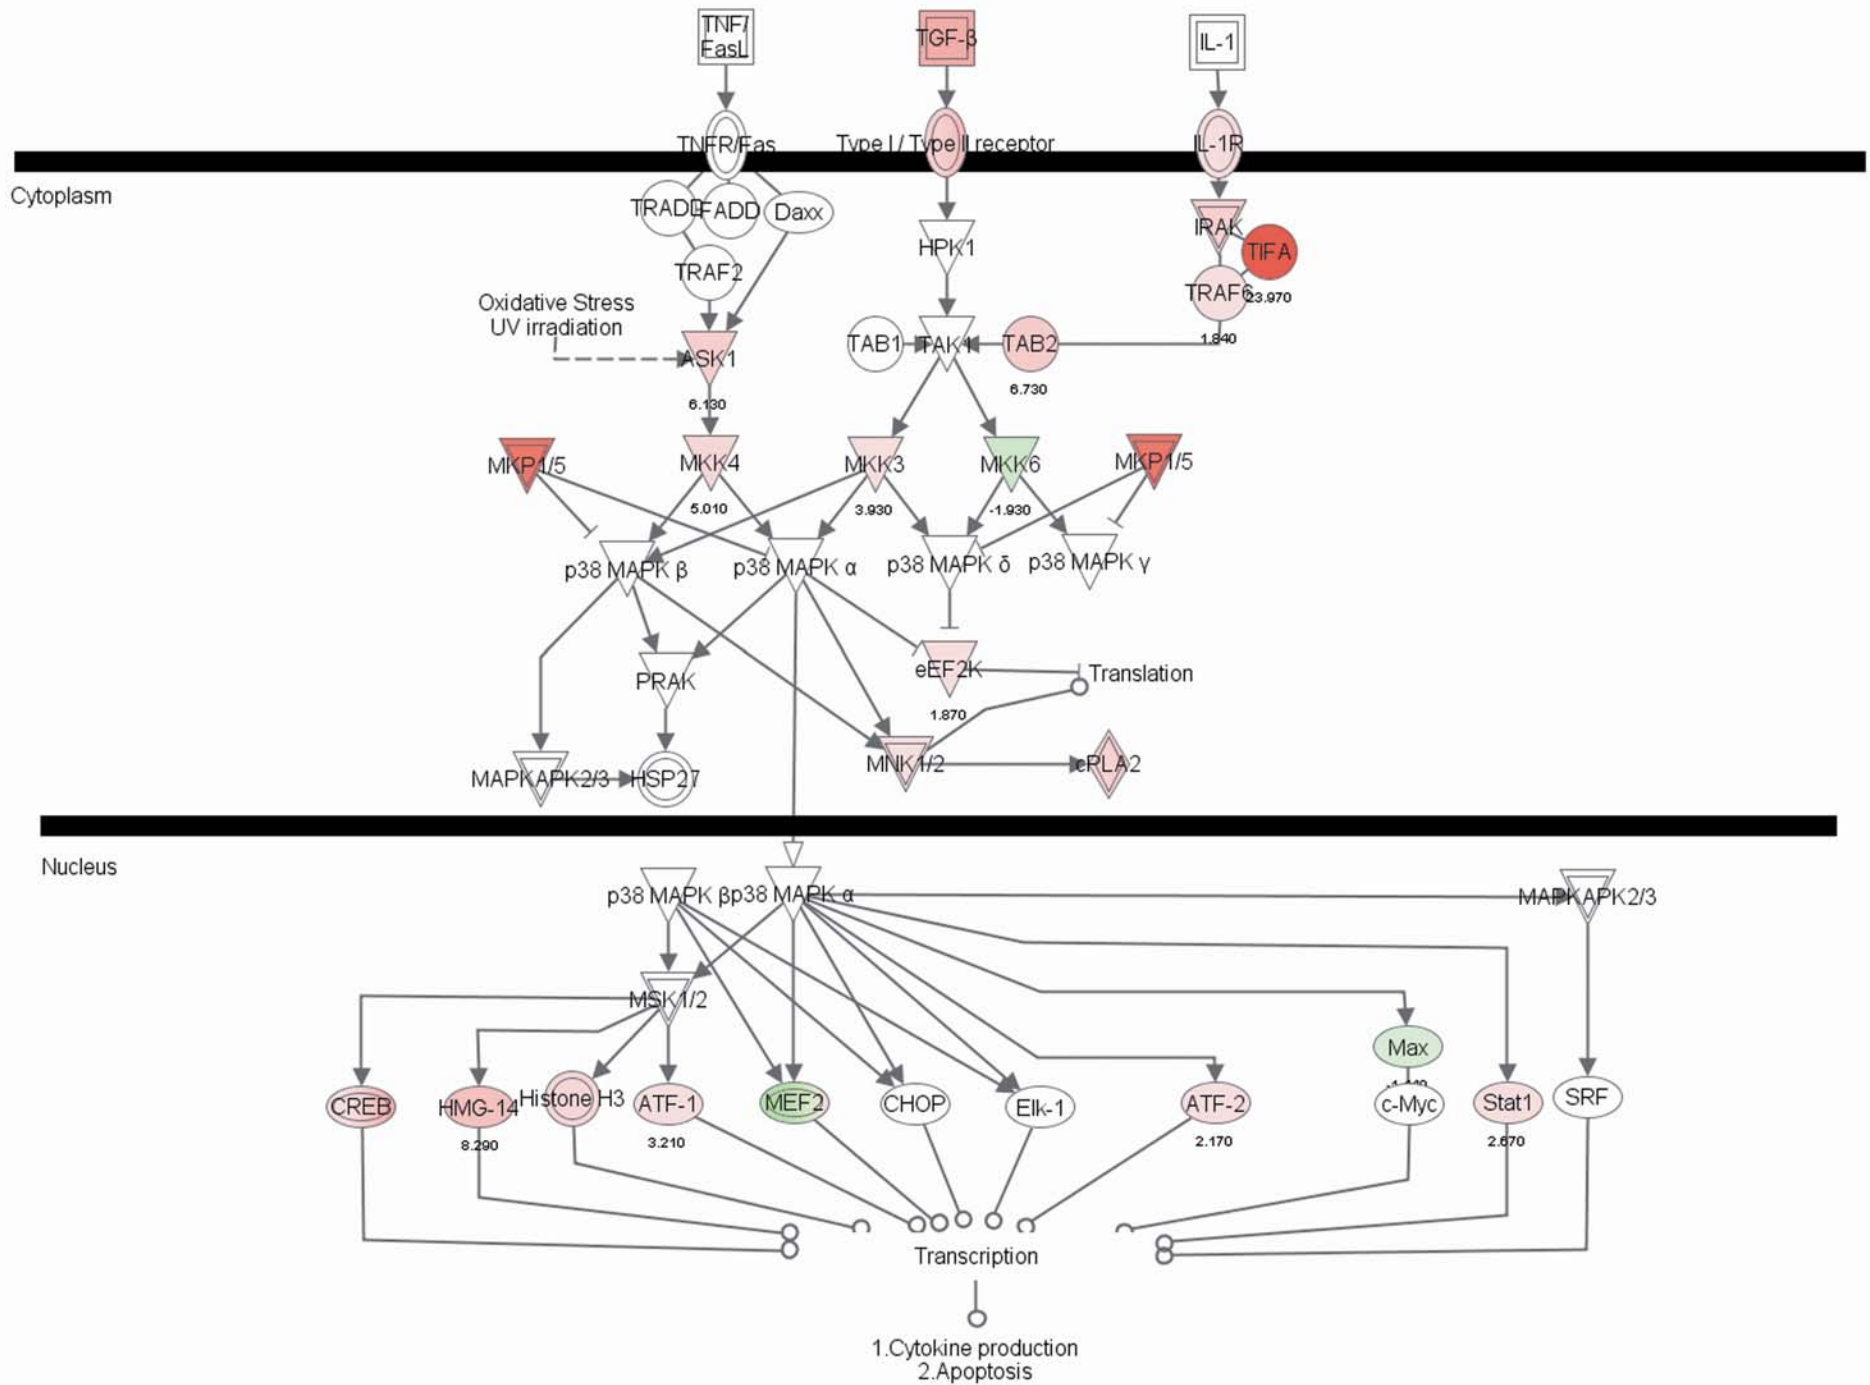

Fig. 4S

Supplement: jcem_jc.2007-0931_5.pdf [file jcem_jc.2007-0931_5.pdf]

Death Receptor Signaling

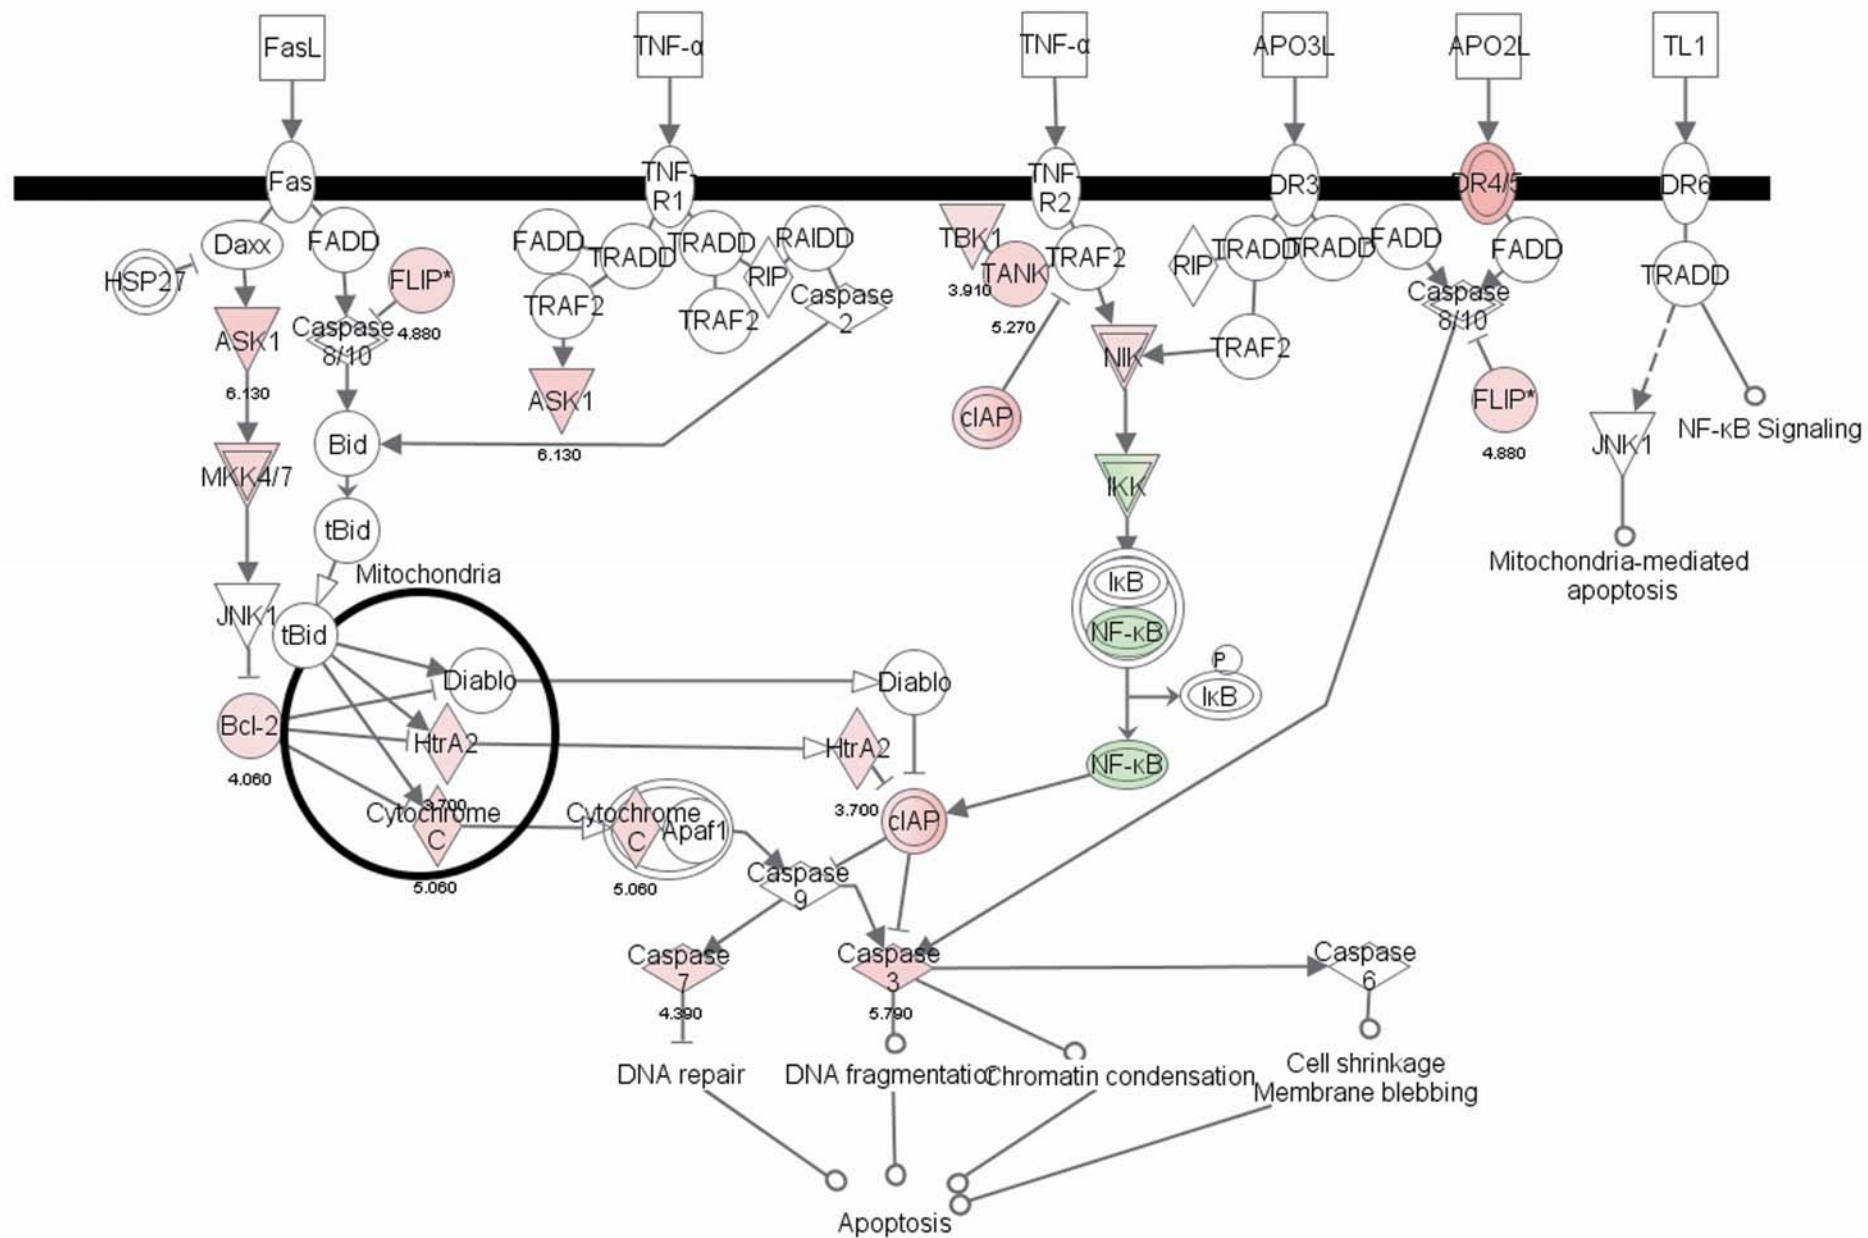

Fig. 5S

Supplement: jcem_jc.2007-0931_6.pdf [file jcem_jc.2007-0931_6.pdf]
